# Supplementary material
Source: PubMed Central journal article supplement (PMC5809795)
Supplement: npp2017251x6.pdf [file npp2017251x6.pdf]

| Case # | Sex    | Body weight (kg) | Age (yr)    | Sex          | Temp         | Cause of death | Mode of death               | Warm time min (h)                         | Warm time min (h) | Cold time (h) | Total time min (h) | Total time min (h) | Biopsy | Blood alcohol conc (g/100 ml) | Drugs in blood | Alcohol use* / h/w | Phone use* / h/w | Work use* / h/w                 | Depression | Liver pathology              |                     |                  |                    |             |
|--------|--------|------------------|-------------|--------------|--------------|----------------|-----------------------------|-------------------------------------------|-------------------|---------------|--------------------|--------------------|--------|-------------------------------|----------------|--------------------|------------------|---------------------------------|------------|------------------------------|---------------------|------------------|--------------------|-------------|
| 2      | Male   | 87               | 108         | 24           | M            | Control        | Acute myocardial infarction | Natural                                   | 4.1               | 4.1           | 20.0               | 48                 | 48     | 0.17                          | negative       | No                 | No               | No                              | No         | Slight steatosis             |                     |                  |                    |             |
| 3      | Female | 87               | 175         | 57           | M            | Control        | Coronary atherosclerosis    | Natural                                   | 7                 | 8             | 49                 | 47                 | 48     | 0.72                          | negative       | No                 | No               | No                              | No         | Slight steatosis             |                     |                  |                    |             |
| 4      | Female | 150              | 166         | 52           | M            | Control        | Acute myocardial infarction | Natural                                   | 3                 | 3             | 36                 | 36                 | 36     | 0.7                           | negative       | No                 | No               | No                              | No         | Slight steatosis             |                     |                  |                    |             |
| 5      | Female | 1417             | 95          | 165          | 51           | F              | Control                     | Brain/hippocampus/amygdala                | Natural           | 13.75         | 12.75              | 45.75              | 58.5   | 58.5                          | 1.99           | negative           | No               | No                              | No         | No                           | Moderate steatosis  |                  |                    |             |
| 6      | Female | 1462             | 87          | 169          | 43           | M              | Control                     | Acute myocardial infarction               | Natural           | 5.5           | 5.5                | 35                 | 40.5   | 40.5                          | 0.71           | negative           | No               | No                              | No         | No                           | Normal              |                  |                    |             |
| 7      | Female | 1412             | 86          | 176          | 74           | M              | Control                     | Coronary atherosclerosis                  | Natural           | 8.5           | 8.5                | 36                 | 44.5   | 44.5                          | 0.3            | negative           | No               | No                              | No         | No                           | Normal              |                  |                    |             |
| 8      | Female | 1788             | 89          | 168          | 43           | M              | Control                     | Coronary atherosclerosis                  | Natural           | 8             | 8                  | 32                 | 40     | 40                            | 0.3            | negative           | No               | No                              | No         | No                           | Normal              |                  |                    |             |
| 9      | Female | 1351             | 79          | 178          | 43           | F              | Control                     | Chronic hepatocellular                    | Natural           | 4.75          | 41.25              | 41.25              | 48     | 48.5                          | 0.58           | negative           | No               | No                              | No         | No                           | Normal              |                  |                    |             |
| 10     | Female | 1643             | 64          | 166          | 37           | F              | Control                     | Thrombotic stroke rupture                 | Accident          | 8.5           | 8.5                | 17.25              | 25.75  | N/A                           | negative       | No                 | No               | No                              | No         | Normal                       |                     |                  |                    |             |
| 11     | Female | 1344             | 59          | 147          | 71           | F              | Control                     | Drowning                                  | Underreported     | 2.75          | 2.75               | 19                 | 21.75  | 21.75                         | 0.13           | 0.56               | negative         | No                              | No         | No                           | No                  | Normal           |                    |             |
| 12     | Female | 1522             | 107         | 184          | 28           | M              | Control                     | Pathologic embolism                       | Natural           | 3             | 1.75               | 28.75              | 31.75  | 34.5                          | 1.65           | negative           | No               | No                              | No         | No                           | Normal              |                  |                    |             |
| 13     | Female | 1420             | 40          | 164          | 48           | F              | Control                     | Drowning                                  | Subtle            | 7             | 7                  | 38                 | 41     | 41                            | 0.17           | negative           | No               | Oxycodone                       | No         | Yes                          | No anti-depressants |                  |                    |             |
| 14     | Female | 1451             | 42          | 177          | 29           | M              | Control                     | Thrombotic stroke rupture                 | Accident          | 6             | 6                  | 30                 | 36     | 36                            | 0.76           | negative           | No               | No                              | No         | No                           | Normal              |                  |                    |             |
| 15     | Female | 1485             | 83          | 169          | 79           | M              | Control                     | Acute myocardial infarction               | Natural           | 7             | 7                  | 38                 | 25     | 25                            | 0.32           | negative           | No               | No                              | No         | No                           | Normal              |                  |                    |             |
| 16     | Female | 1451             | 58          | 167          | 49           | F              | Control                     | Smoking                                   | Subtle            | 20            | 20                 | 127                | 60     | 60                            | 0.78           | negative           | No               | No                              | No         | No                           | Slight steatosis    |                  |                    |             |
| 17     | Female | 1440             | 83          | 165          | 65           | M              | Control                     | Acute myocardial infarction               | Natural           | 5             | 9                  | 59                 | 64     | 68                            | 0.75           | negative           | No               | No                              | No         | No                           | Normal              |                  |                    |             |
| 18     | Female | 1522             | 84          | 171          | 41           | M              | Control                     | ischemic heart disease                    | Natural           | 4             | 4                  | 7.25               | 11.25  | 11.25                         | 1.56           | negative           | No               | No                              | No         | No                           | Normal              |                  |                    |             |
|        |        | <b>Mean</b>      | <b>7.82</b> | <b>8.62</b>  | <b>33.69</b> | <b>89.79</b>   | <b>43.28</b>                | <b>0.58</b>                               |                   |               |                    |                    |        |                               |                |                    |                  |                                 |            |                              |                     |                  |                    |             |
|        |        | <b>SD</b>        | <b>4.88</b> | <b>6.47</b>  | <b>23.68</b> | <b>17.76</b>   | <b>21.95</b>                | <b>0.23</b>                               |                   |               |                    |                    |        |                               |                |                    |                  |                                 |            |                              |                     |                  |                    |             |
|        |        | <b>Median</b>    | <b>6.00</b> | <b>7.00</b>  | <b>34.00</b> | <b>45.00</b>   | <b>45.00</b>                | <b>0.57</b>                               |                   |               |                    |                    |        |                               |                |                    |                  |                                 |            |                              |                     |                  |                    |             |
| 19     | Female | 1551             | 98          | 190          | 60           | M              | Alcoholic Intoxication      | Accident                                  | 3                 | 3             | 42                 | 45                 | 45     | 0.78                          | 2.85           | Yes                | Yes              | Yes                             | Yes        | Bupropion/other recreational | No                  | User controls    |                    |             |
| 20     | Female | 1521             | 75          | 176          | 59           | M              | Alcoholic Intoxication      | Subtle                                    | 4                 | 1.75          | 20                 | 27                 | 28.75  | 0.56                          | negative       | Yes                | No               | No                              | Yes        | No anti-depressants          | No                  | Slight steatosis |                    |             |
| 21     | Female | 1551             | 106         | 183          | 49           | M              | Alcoholic Intoxication      | Accident                                  | 5                 | 15            | 12                 | 17                 | 27     | 0.7                           | 0.12           | Yes                | No               | No                              | No         | No                           | No                  | User controls    |                    |             |
| 22     | Female | 1467             | 76          | 175          | 52           | F              | Alcoholic Intoxication      | Accident                                  | 3                 | 15            | 48                 | 42                 | 50     | 1.07                          | 1.1            | Yes                | No               | No                              | No         | No                           | No                  | Fatty liver      |                    |             |
| 23     | Female | 1494             | 86          | 179          | 54           | M              | Alcoholic Intoxication      | Accident                                  | 2                 | 2             | 50                 | 52                 | 52     | 0.25                          | 1.88           | Yes                | No               | No                              | No         | No                           | No                  | Fatty liver      |                    |             |
| 24     | Female | 1474             | 86          | 177          | 54           | M              | Alcoholic Intoxication      | Natural                                   | 5.25              | 17.75         | 41.25              | 60.75              | 61.25  | 1.48                          | negative       | Yes                | No               | No                              | No         | No                           | No                  | Normal           |                    |             |
| 25     | Female | 1360             | 88          | 169          | 50           | M              | Alcoholic Intoxication      | Natural                                   | 3.25              | 3.25          | 2                  | 2.25               | 2.25   | N/A                           | negative       | Yes                | No               | No                              | No         | No                           | No                  | User controls    |                    |             |
| 26     | Female | 1341             | 43          | 178          | 43           | M              | Alcoholic Intoxication      | Brain/hippocampus                         | Natural           | 5.3           | 5.3                | 38                 | 23.3   | 23.3                          | 0.72           | negative           | Yes              | No                              | No         | No                           | No                  | No               | Fatty liver        |             |
| 27     | Female | 1474             | 103         | 185          | 63           | M              | Alcoholic Intoxication      | Accident                                  | 3                 | 3             | 12.3               | 15.3               | 15.3   | 1.96                          | negative       | Yes                | Tramadol         | No                              | No         | No                           | No                  | Fatty liver      |                    |             |
| 28     | Female | 1451             | 118         | 179          | 65           | M              | Alcoholic Intoxication      | Accident                                  | 11                | 11            | 65.3               | 66.3               | 66.3   | 1.44                          | 1.3            | Yes                | No               | No                              | No         | No                           | No                  | Fatty liver      |                    |             |
| 29     | Female | 1621             | 93          | 181          | 66           | M              | Alcoholic Intoxication      | Drowning                                  | 6.5               | 7             | 40                 | 46.5               | 47     | 0.32                          | 1.12           | Yes                | No               | No                              | No         | No                           | No                  | Fatty liver      |                    |             |
| 30     | Female | 1370             | 71          | 172          | 44           | M              | Alcoholic Intoxication      | Phenoxanthine                             | Natural           | 3             | 3                  | 27.25              | 30.25  | 30.25                         | 1.96           | 2.51               | Yes              | No                              | No         | No                           | No                  | No               | Fatty liver        |             |
| 31     | Female | 1390             | 89          | 174          | 67           | M              | Alcoholic Intoxication      | Acute myocardial infarction + pneumonia   | Natural           | 6.75          | 11.25              | 39.5               | 39.25  | 40.75                         | 0.50           | positive           | Yes              | No                              | No         | No                           | No                  | No               | User controls      |             |
| 32     | Female | 1720             | 119         | 184          | 51           | M              | Alcoholic Intoxication      | Acute alcohol intoxication + endotracheal | Natural           | 5             | 19.25              | 21.25              | 26.75  | 41                            | 0.55           | 2.8                | Yes              | No                              | No         | No                           | No                  | No               | User controls      |             |
| 33     | Female | 1430             | 65          | 169          | 30           | M              | Alcoholic Intoxication      | Brain edema due to acute heart failure    | Natural           | 4.7           | 4.7                | 11                 | 19.7   | 19.7                          | 0.15           | negative           | Yes              | Sertraline, oxycodone, tramadol | No         | Yes                          | Sertraline-treated  | Normal           |                    |             |
| 34     | Female | 1341             | 79          | 171          | 40           | M              | Alcoholic Intoxication      | Subtle coma                               | Natural           | 12            | 12                 | 44                 | 26     | 41                            | 0.32           | 1.82               | Yes              | No                              | No         | No                           | No                  | Yes              | Quetiapine-treated | Fatty liver |
| 35     | Female | 1550             | 130         | 183          | 48           | M              | Alcoholic Intoxication      | Brain edema due to acute heart failure    | Natural           | 1             | 3                  | 9                  | 12     | 12                            | 1.06           | negative           | Yes              | No                              | No         | No                           | No                  | No               | Fatty liver        |             |
| 36     | Female | 1612             | 91          | 187          | 51           | M              | Alcoholic Intoxication      | Clearing vomit emergency                  | Natural           | 4             | 4                  | 14                 | 14     | 14                            | 0.21           | negative           | Yes              | No                              | No         | No                           | No                  | No               | Fatty liver        |             |
|        |        | <b>Mean</b>      | <b>4.48</b> | <b>24.81</b> | <b>28.59</b> | <b>33.88</b>   | <b>38.43</b>                | <b>0.39</b>                               |                   |               |                    |                    |        |                               |                |                    |                  |                                 |            |                              |                     |                  |                    |             |
|        |        | <b>SD</b>        | <b>2.67</b> | <b>7.80</b>  | <b>11.29</b> | <b>11.48</b>   | <b>13.38</b>                | <b>0.81</b>                               |                   |               |                    |                    |        |                               |                |                    |                  |                                 |            |                              |                     |                  |                    |             |
|        |        | <b>Median</b>    | <b>4.31</b> | <b>6.38</b>  | <b>23.25</b> | <b>27.62</b>   | <b>41.00</b>                | <b>0.25</b>                               |                   |               |                    |                    |        |                               |                |                    |                  |                                 |            |                              |                     |                  |                    |             |

\*Reported use of alcohol, pharmaceutical drugs and illicit drugs, respectively, the 4 weeks preceding death
