# Supplementary material
Source: PubMed Central journal article supplement (PMC5809795)
Supplement: npp2017251x7.pdf [file npp2017251x7.pdf]

| Mean and Median   |             |               | P-values                       |                     |
|-------------------|-------------|---------------|--------------------------------|---------------------|
| <b>Controls</b>   | <b>Mean</b> | <b>Median</b> | <b>Controls</b>                | <b>Significance</b> |
| Ki67              | 67.6        | 67.5          | Ki67 vs. Sox2                  | p = 0.0025          |
| Sox2              | 54.8        | 56.0          | Sox2 vs. DCX                   | p = 0.0002          |
| DCX               | 49.3        | 47.0          | DCX vs. Ki67                   | p < 0.0001          |
| <b>Alcoholics</b> |             |               | <b>Alcoholics</b>              |                     |
| Ki67              | 57.2        | 64.0          | Ki67 vs. Sox2                  | p = 0.5282          |
| Sox2              | 53.4        | 55.0          | Sox2 vs. DCX                   | p = 0.0080          |
| DCX               | 47.3        | 44.0          | DCX vs. Ki67                   | p = 0.1757          |
| <b>All cases</b>  |             |               | <b>All cases</b>               |                     |
| Ki67              | 67.6        | 65.0          | Ki67 vs. Sox2                  | p = 0.0035          |
| Sox2              | 54.5        | 56.0          | Sox2 vs. DCX                   | p < 0.0001          |
| DCX               | 48.6        | 46.0          | DCX vs. Ki67                   | p < 0.0001          |
|                   |             |               | <b>Controls vs. Alcoholics</b> |                     |
|                   |             |               | Ki67 Ctrl vs. Ki67 Alc         | p = 0.2810          |
|                   |             |               | Sox2 Ctrl vs. Sox2 Alc         | p = 0.3684          |
|                   |             |               | DCX Ctrl vs. DCX Alc           | p = 0.2471          |
|                   |             |               | Mann Whitney U-test            |                     |
