# Supplementary material
Source: PubMed Central journal article supplement (PMC5809795)

**A**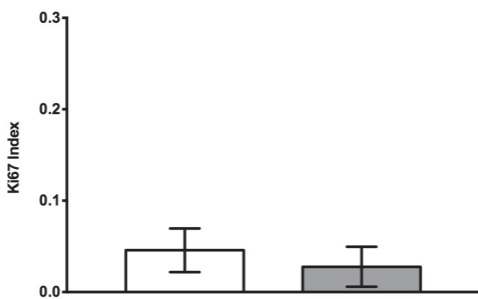**B**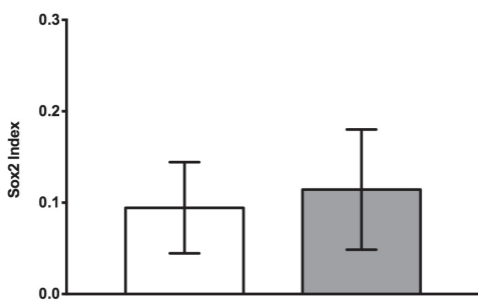**C**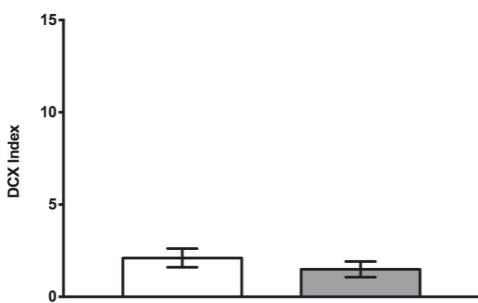

Supplement: npp2017251x1.pdf [file npp2017251x1.pdf]

**A**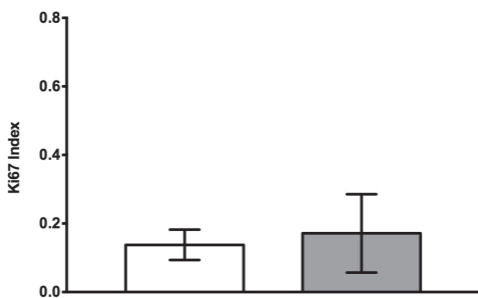**B**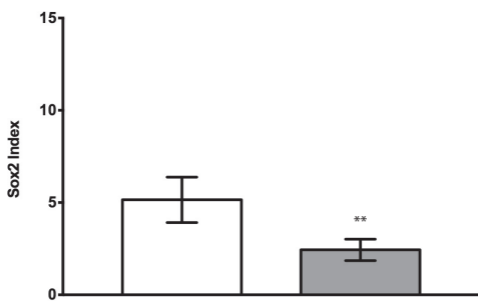**C**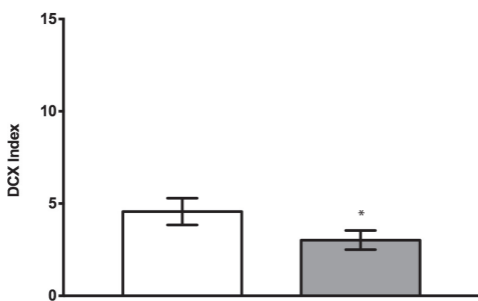

Supplement: npp2017251x2.pdf [file npp2017251x2.pdf]

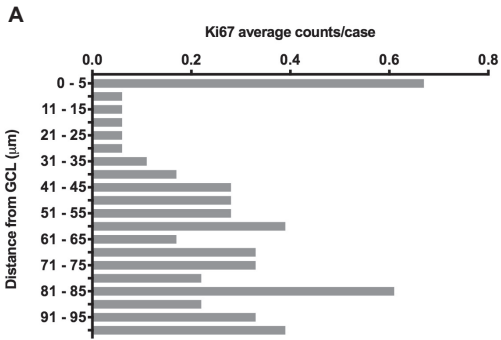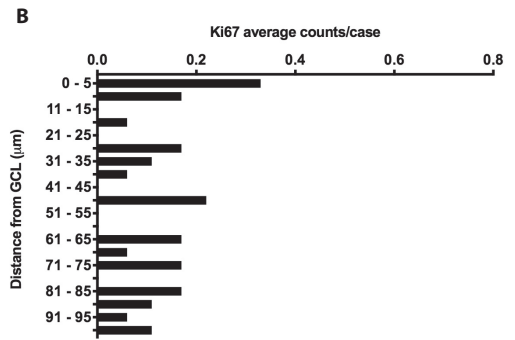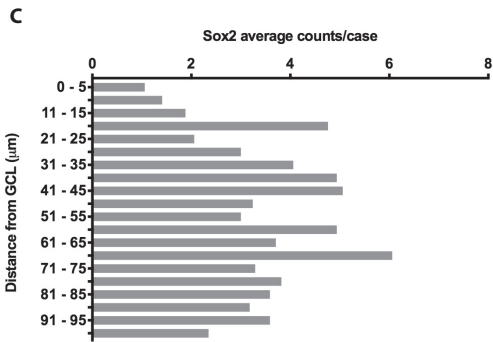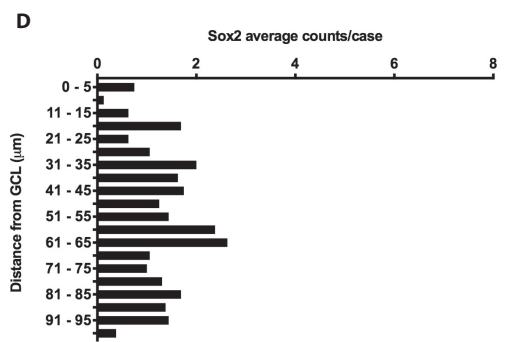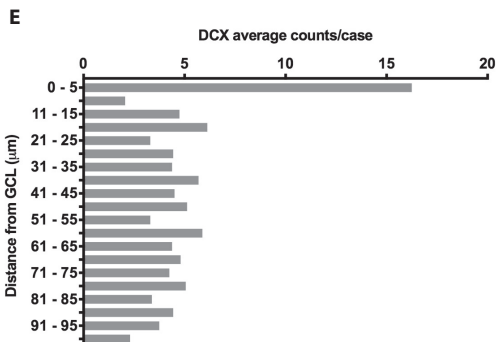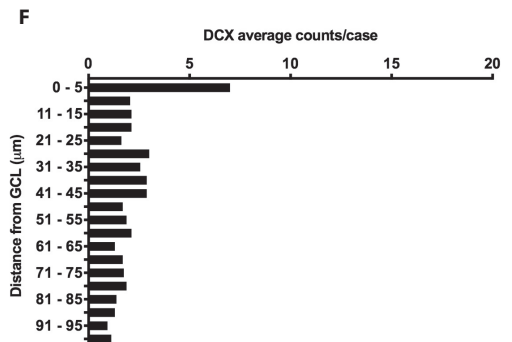

Supplement: npp2017251x3.pdf [file npp2017251x3.pdf]

**A**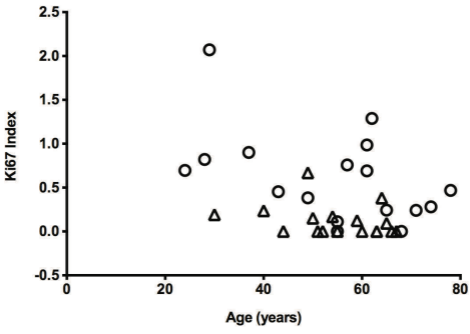**B**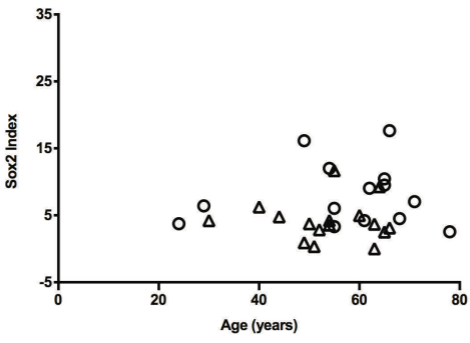**C**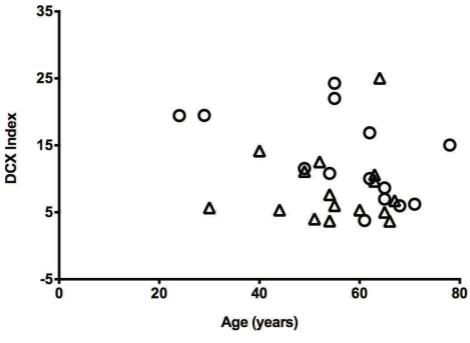

Supplement: npp2017251x4.pdf [file npp2017251x4.pdf]
